# Spatiotemporal Analysis of COVID-19 Risk in Malawi: The Impact of Age, Poverty, Population Density, and Environmental Factors

Mwandida Kamba Afuleni<sup>a,b</sup>, Ian Hall<sup>a</sup>, Thomas House<sup>a</sup>, Olatunji Johnson<sup>a</sup>

<sup>a</sup>*Department of Mathematics, University of Manchester, Oxford Road, Manchester, M13 9PL, United Kingdom*

<sup>b</sup>*Department of Mathematical Sciences, School of Science and Technology, Malawi University of Business and Applied Sciences, Chichiri, Blantyre, Malawi*

---

## Abstract

**Background:** Understanding the spatiotemporal variation of COVID-19 transmission and its determinants is crucial for gaining deeper insights into the dynamics of disease spread. Regional and temporal differences in demographics, socioeconomic conditions, and environmental factors shaped the trajectory of the COVID-19 pandemic, underscoring the importance of advanced spatio-temporal modelling. This research aims to construct a spatiotemporal model to examine the relationship between age groups, poverty, population density, precipitation, and COVID-19 risk, as well as to pinpoint high-risk areas.

**Methods:** Here we present a spatiotemporal statistical analysis using COVID-19 case data from Malawi recorded from 2 April 2020 to 27 March 2022. Bayesian spatiotemporal models were fitted, with weekly confirmed cases as the response variable and demographic, socioeconomic, and environmental factors as predictors.

**Results:** The findings reveal that spatial and temporal factors, along with age, population density, and poverty, significantly affect observed COVID-19 incidence in Malawi, whereas precipitation does not. The greatest risk was observed during colder months (June–July), December’s festive season, and

---

\*Word count: 1,772

January. Urban centres and lake-shore districts were disproportionately impacted, with individuals aged 40 – 49 at particularly high risk.

**Conclusions:** These results emphasise the need to prioritise vaccinations for working-age populations in urban and tourist areas during high-risk periods. Moreover, ensuring adherence to public health guidelines and enhancing healthcare services in these districts is critical.

*Keywords:*

Spatiotemporal modelling, Malawi COVID-19 transmission, COVID-19 hotspot identification, Spatial and temporal random effects.

---

### Key Messages

- The age group 40–49 faced a significantly higher risk of COVID-19 compared to all other age groups.
- COVID-19 risk is generally low across Malawi during the study period, with Blantyre being a notable exception.
- Positive associations were identified between COVID-19 risk and factors such as age, poverty levels, and population density.
- Both spatial and temporal dynamics were found to have substantial impacts on COVID-19 transmission risk.

## 1. Introduction

Infectious diseases remain a significant global concern and leading cause of death [1]. Over the past two decades, respiratory infectious diseases caused by coronaviruses like the Severe Acute Respiratory Syndrome Coronavirus (SARS-CoV), the Middle East Respiratory Syndrome Coronavirus (MERS-CoV), and Severe Acute Respiratory Syndrome Coronavirus-2 (SARS-CoV-2) have posed major threats to global health [2, 3]. SARS-CoV-2, responsible for COVID-19, emerged in Wuhan, China, in December 2019 and spread worldwide within three months [4, 5]. Declared a Public Health Emergency of International Concern (PHEIC) by the WHO on January 30, 2020 [6], it had infected over 100 million people and caused two million deaths within a year [7]. Africa reported its first case on February 14, 2020, with the virus spreading continent-wide in three months [7]. In Malawi, the first confirmed

14 COVID-19 case was reported in Lilongwe on April 2, 2020, two weeks after  
15 the president pre-emptively declared a state of national disaster on March  
16 20 [8, 9, 10].

17 A range of demographic, socioeconomic, and environmental factors influ-  
18 ence SARS-CoV-2 dynamics [11, 12, 13]. Key drivers include age [14], with  
19 older individuals (particularly those aged 60 and over) at higher risk [15],  
20 and poverty, which is linked to increased risk due to reduced adherence to  
21 interventions by low-income populations prioritising daily survival [16, 17].  
22 In the USA, poverty was positively associated with infection risk early in  
23 the pandemic however, the association later changed to negative assumably  
24 due to case under-ascertainment among the less privileged individuals, when  
25 the testing resources became scarce [18]. Population density has also been  
26 claimed to impact SARS-CoV-2 risk [13, 15, 16], though some studies found  
27 it not significant [19]. Tourism correlates with case surges, as imported cases  
28 often contribute to the spread [13]. COVID-19 transmission occurs through  
29 respiratory fluids [4, 5, 20], with low temperatures, precipitation and humid-  
30 ity enhancing spread [11, 21, 22, 23]. Air pollution has been linked to higher  
31 mortality, with studies reporting increased COVID-19 deaths in heavily pol-  
32 luted areas [12].

33 Studies on spatial and spatiotemporal modelling of COVID-19 have been  
34 conducted in many parts of the world, including Africa. Researchers use  
35 geographical information systems (GIS) and / or Bayesian statistical models  
36 for analysis [24]. Some studies in Africa include Gayawan *et al.* (2020) [25],  
37 who used a two-parameter hurdle Poisson model; Tong *et al.* (2022) [26]  
38 who employed GIS; Adekunle *et al.* (2020) [27], who applied generalised  
39 additive models; and Abdul (2020) [28], who utilised an endemic-epidemic  
40 multivariate time-series model.

41 At the time of this study, two spatiotemporal modelling studies on SARS-  
42 CoV-2 in Malawi had been conducted. One, by Chinkaka *et al.* (2023)[15],  
43 covered the period from April 2020 to May 2021 using GIS and found signifi-  
44 cant effects of age (particularly being 60+ years old) and population density  
45 on disease risk. The other, by Ngwira *et al.* (2021)[16], focused on the early  
46 phase of the pandemic, when there was only one wave. Conducted from April  
47 to October 2020, it used semiparametric spatiotemporal models and found a  
48 higher risk of COVID-19 in major cities compared to rural areas, attributing  
49 this to higher population density in urban settings. The study also identified  
50 significant effects of location, time, and space-time interaction on COVID-19.  
51 During this phase, the pandemic peaked in August 2020, with a positive and

52 significant correlation between risk and age (here being 65+ years old).

53 This study aims to develop a multi-variable spatiotemporal model for  
54 SARS-CoV-2 cases in Malawi, incorporating spatial, temporal, age and their  
55 interactions. Using data collected from April 2, 2020, to March 27, 2022 –  
56 covering four major waves – the study has three primary objectives: (1) to  
57 identify the combination of demographic, socioeconomic, and environmental  
58 factors driving the spatial variation in SARS-CoV-2 cases across Malawian  
59 districts; (2) to map the spatial heterogeneity in the relative risk of SARS-  
60 CoV-2; and (3) to identify hotspot districts over time across different age  
61 groups.

## 62 2. Methods

### 63 2.1. Study area

64 Malawi is a landlocked country bordered by Mozambique to the east,  
65 south, and southwest; Tanzania to the north and northeast; and Zambia to  
66 the west and northwest. Geographically, it lies between latitudes 9° 22' S and  
67 17° 03' S, and longitudes 33° 40' E and 35° 55' E. With a total surface area of  
68 around 120,000 km<sup>2</sup> [29], Malawi has an estimated population of just over 18  
69 million [30]. The country is divided into three regions—Northern, Central,  
70 and Southern—which are further subdivided into 28 districts. According to  
71 the 2018 Population and Housing Census, the capital city, Lilongwe, located  
72 in the Central Region, has the highest population proportion at 9.3%. Over  
73 80% of the population resides in rural areas, with 16% in urban centres.  
74 Notably, half of Malawi’s population is aged 17 years or younger [30]. Fig.1A  
75 illustrates a map of Malawi, highlighting its 27 districts on the mainland.

### 76 2.2. Data and data sources

77 Line list data on confirmed COVID-19 cases collected from 2 April 2020,  
78 to 27 March 2022 was obtained from the Ministry of Health (MoH) through  
79 the Public Health Institute of Malawi (PHIM) [31]. This dataset includes  
80 information on all individuals who tested positive for COVID-19, detailing  
81 variables such as case ID, report date, date of birth, age, gender, district,  
82 and other relevant attributes. Population totals and population density for  
83 the districts were sourced from reports by the National Statistical Office of  
84 Malawi (NSO) available at [https://malawi.unfpa.org/en/publications/  
malawi-2018-population-and-housing-census-main-report](https://malawi.unfpa.org/en/publications/malawi-2018-population-and-housing-census-main-report) [30]. Data  
85

86 on the proportion of the population living on \$1.25 or less per day, mea-  
87 sured per grid square (1 km by 1 km at the equator), was obtained from  
88 the WorldPop website [https://hub.worldpop.org/doi/10.5258/SOTON/  
89 WP00290](https://hub.worldpop.org/doi/10.5258/SOTON/WP00290) [32]. The poverty proportion for each district was subsequently  
90 calculated using a population-weighted average across the district. Environ-  
91 mental data was also considered in this study. In particular, precipitation  
92 and humidity data were obtained from NASA POWER Project Team (2024)  
93 [33] and temperature data was obtained from WorldClim Team (2024) [34].

### 94 *2.3. Outcome variable*

95 The outcome variable is the weekly number of confirmed COVID-19 cases,  
96 starting from the date of the first recorded case on April 2, 2020, to March  
97 27, 2022, encompassing the first four waves over 105 epidemiological weeks.  
98 Data from April 2022 onward was excluded from the analysis, as almost all  
99 districts reported zero cases, rendering the data unsuitable for modelling.  
100 Case data was collected by the Ministry of Health through polymerase chain  
101 reaction (PCR) tests conducted on nasal samples from individuals presenting  
102 symptoms of the infection and those identified as close contacts of confirmed  
103 cases.

### 104 *2.4. Covariates*

105 The variables considered in the model are age, population density, poverty,  
106 precipitation, humidity and temperature, as these factors have been shown to  
107 influence the risk of COVID-19. Population density is included as a covariate  
108 because it has been identified as a factor that might impact on the spread  
109 of SARS-CoV-2, given the role of social mixing in transmission [13, 35].  
110 Similarly, poverty is considered due to its reported impact on SARS-CoV-2  
111 transmission [16, 18], though studies differ on the nature of this association.  
112 This study seeks to determine whether poverty has a significant effect on  
113 COVID-19 risk and to explore whether the correlation is positive or nega-  
114 tive. Fig.1B illustrates the total population across districts, while Fig.2A  
115 and Fig.2B depict the spatial distribution of key geospatial covariates.

116 It is widely recognized that there is a direct association between COVID-  
117 19 incidence and old age. While the older age group was included as a  
118 predictor in this study, the research was extended also to examine the young  
119 and middle-aged groups. We used quantile-based grouping to create five age  
120 groups of roughly equal number of cases and this was done for the follow-  
121 ing reasons: balanced representation, model stability, help reduce noise and

122 facilitate Comparability among groups leading to more interpretable results.  
123 The age groups include: 0 – 1, 20 – 29, 30 – 39, 40 – 49 and 50+. Fig. 1  
124 in the Supplementary Material 3.2 shows an age histogram. The mean and  
125 median ages are 36.24 and 34, respectively. Additionally, 25% of the study  
126 population is 46 years old or above.

127 Table 1 presents the description and spatial and temporal resolution of  
128 the variables used in this study.

Table 1: Data sources, description and properties of the variables

| Category                                        | Variable           | Variable description and pre-processing                                                                                                                                                                                                                                           | Temporal resolution (weeks) | Temporal coverage              | Spatial resolution        |
|-------------------------------------------------|--------------------|-----------------------------------------------------------------------------------------------------------------------------------------------------------------------------------------------------------------------------------------------------------------------------------|-----------------------------|--------------------------------|---------------------------|
| <i>Outcome</i>                                  | COVID-19 cases     | Weekly number of confirmed COVID-19 cases for the first four waves over 105 epidemiological weeks for each district.                                                                                                                                                              | 1                           | 2 April 2020 to 27 March 2022. | District level            |
| <i>Demographic and socioeconomic covariates</i> | Age                | Age group of the confirmed cases; 0-19, 20-29, 30-39, 40-49 and 50+. The age brackets were determined using quantiles and demographic data on the age distribution of the total population.                                                                                       | None                        | 2018                           | District level            |
|                                                 | Population density | Number of people per km <sup>2</sup> .                                                                                                                                                                                                                                            | None                        | 2018                           | District level            |
|                                                 | Poverty            | The proportion of the population living in poverty, defined as living on under \$1.25 per day, was extracted from a tagged image file (TIF). This data was read into R as a <code>stars</code> object, and then aggregated to calculate the poverty proportion for each district. | None                        | 2010                           | 1km by 1km at the equator |
| <i>Environmental covariates</i>                 | Temperature        | The quantitative measure of heat present in an environment, influencing physical and biological processes population-weighted averaged over the districts and measured in degrees celsius.                                                                                        | 1                           | April 2020 to March 2022       | 1km by 1km                |
|                                                 | Relative Humidity  | A percentage of the maximum amount of moisture the air can hold at a given temperature, population-weighted averaged over the districts.                                                                                                                                          | 1                           | April 2020 to March 2022       | 55.6 km by 55.6 km.       |
|                                                 | Precipitation      | Any type of water that forms in the Earth's atmosphere and then drops onto the surface of the Earth population-weighted averaged over the districts and measured in millimeters.                                                                                                  | 1                           | April 2020 to March 2022       | 55.6 km by 55.6 km.       |

129 *2.5. Model formulation*

130 We used Bayesian hierarchical spatio-temporal framework to model the  
131 weekly observed counts of COVID-19 cases. Let  $i = 1, 2, \dots, 28$  denote  
132 the index for the spatial areas (districts),  $j = 1, 2, \dots, 105$  denotes the time  
133 points in weeks from 2 April 2020 to 31 December 2022 and  $k = 1, 2, \dots, 5$   
134 denotes the index for age groups 0-19, 20-29, 30-39, 40-49, and 50+. Let  $Y_{ijk}$   
135 denote the random variable of the number of SARS-CoV-2 confirmed cases  
136 in district  $i$ , week  $j$  and age category  $k$ . Then we model  $Y_{ijk}$  as follows:

$$Y_{ijk} \sim \text{Poisson}(E_{ijk}\theta_{ijk}), \quad (1)$$

where  $E_{ijk}$  is the expected number of cases in the absence of any heterogeneity  
in individual risk and  $\theta_{ijk}$  is the relative risk (RR) in district  $i$ , week  $j$  and  
age group  $k$ .  $E_{ijk}$  is therefore calculated as,

$$E_{ijk} = N_{ijk} \times \hat{r},$$

where  $N_{ijk}$  is the population in district  $i$ , week  $j$  and age group  $k$  and

$$\hat{r} = \frac{\sum_{ijk} Y_{ijk}}{\sum_{ijk} N_{ijk}}$$

137 is the global observed disease rate. The log-relative risk is modelled as

$$\log(\theta_{ijk}) = \eta_{ijk}, \quad (2)$$

138 where  $\eta_{ijk}$  is a linear predictor. This linear predictor is modelled as a linear  
139 combination of fixed and random effects and ten candidate models were ex-  
140 amined as shown in Table 2, with prior specification in the Table caption.

141



Table 2: Random effects models for district  $i$ , time  $j$  and age  $k$ .  $\beta_l \sim N(0, \sigma_{\beta_l}^2)$ ,  $\alpha_j \sim N(0, \sigma_{\alpha_j}^2)$ ,  $\omega_j \sim N(\omega_{j-1}, \sigma_{\omega}^2)$ ,  $\delta_j \sim N(\delta_{j-1}, \sigma_{\delta}^2)$ ,  $u_i + v_i \sim \text{BYM2}(\sigma_u^2, \phi)$ , three structures for linear time trend  $u_j \sim N(\beta t, \sigma_t^2)$ , Random walk 1  $u_j \sim N(u_{j-1}, \sigma_u^2)$ , Random walk 2  $u_j \sim N(2u_{j-1} + u_{j-2}, \sigma_u^2)$ ,  $v_j \sim N(0, \sigma_v^2)$ ,  $\phi_{ij} \sim \text{TYPE I, II, III, IV}$  [36] and  $\psi_{ijk} \sim N(0, \sigma_{\psi}^2)$ .

| Model | Linear predictor $\eta_{ijk}$                                                                                          |
|-------|------------------------------------------------------------------------------------------------------------------------|
| I     | $\beta_0 + \alpha_k + \beta_1 \text{PRE}_{ijk} + \omega_j + \delta_j$                                                  |
| II    | $\beta_0 + \alpha_k + \beta_1 \text{PRE}_{ijk} + \omega_j + \delta_j + u_i + v_i$                                      |
| III   | $\beta_0 + \alpha_k + \beta_1 \text{PRE}_{ijk} + \omega_j + \delta_j + u_i + v_i + u_j + v_j$                          |
| IV    | $\beta_0 + \alpha_k + \beta_1 \text{PRE}_{ijk} + \omega_j + \delta_j + u_i + v_i + u_j + v_j$                          |
| V     | $\beta_0 + \alpha_k + \beta_1 \text{PRE}_{ijk} + \omega_j + \delta_j + u_i + v_i + u_j + v_j$                          |
| VI    | $\beta_0 + \alpha_k + \beta_1 \text{PRE}_{ijk} + \omega_j + \delta_j + u_i + v_i + u_j + v_j + \phi_{ij}$              |
| VII   | $\beta_0 + \alpha_k + \beta_1 \text{PRE}_{ijk} + \omega_j + \delta_j + u_i + v_i + u_j + v_j + \phi_{ij}$              |
| VIII  | $\beta_0 + \alpha_k + \beta_1 \text{PRE}_{ijk} + \omega_j + \delta_j + u_i + v_i + u_j + v_j + \phi_{ij}$              |
| IX    | $\beta_0 + \alpha_k + \beta_1 \text{PRE}_{ijk} + \omega_j + \delta_j + u_i + v_i + u_j + v_j + \phi_{ij}$              |
| X     | $\beta_0 + \alpha_k + \beta_1 \text{PRE}_{ijk} + \omega_j + \delta_j + u_i + v_i + u_j + v_j + \phi_{ij} + \psi_{ijk}$ |

142 The model specification for the fixed effects is as follows:  $\beta_0$  is the global  
143 intercept;  $\alpha_k$  is the age categories specific intercept for category  $k$ ;  $\beta_1$  is the  
144 effect of precipitation (PRE);  $\omega_j$  is the time-varying effect of poverty;  $\delta_j$   
145 is the time-varying effect of population density. The spatial random effects,  
146 represented as  $u_i + v_i$ , are modelled using the BYM2 framework [37], an al-  
147 ternative parameterization of the BYM (Besag, York and Mollie) model [38].  
148 This formulation introduces a mixing parameter,  $\phi$ , to effectively balance the  
149 contributions of  $u_i$  (structured spatial effects) and  $v_i$  (unstructured spatial  
150 effects).  $u_i$  is modelled using a conditional autoregressive (CAR) structure  
151 [39] and accounts for the spatial dependence between relative risks. This  
152 structure assumes that neighbouring areas are more likely to show similar  
153 risks than areas that are far apart. On the other hand,  $v_i$  models unstruc-  
154 tured spatial effects accounting for independent noise, as neighbouring areas  
155 can be independent. To capture temporal random effects, the term  $u_j + v_j$   
156 is added, where  $u_j$  accounts for the correlated temporal random effects, as-  
157 suming similar risks at close time points, and  $v_j$  models temporal effects  
158 that are independent. In the model,  $\phi_{ij}$  is the space-time interaction term  
159 to account for variation that can not be explained by space and time [40].  
160 As shown in Table 2, four types of interactions, resulting from all possible  
161 combinations of structured and unstructured spatial and temporal effects,  
162 are considered [36], including: Type I interaction, which has an identically  
163 independent distribution and represents the interaction of unstructured spa-  
164 tial and unstructured temporal random effects; Type II interaction, which  
165 assumes structured temporal effects for each area, independent of all other  
166 areas; Type III interaction, which accounts for structured spatial effects for  
167 each time unit, independent of all other time points; and Type IV interac-  
168 tion, which captures correlated spatial and temporal effects. Finally,  $\psi_{ijk}$ ,  
169 representing a space-time-age interaction, is added to extend the four types  
170 of space-time interaction. The full priors specification for the models are  
171 presented in the Supplementary Material.

## 172 2.6. Inference and model selection

173 Analysis was done in R using the INLA package [41]. INLA provides an  
174 approximate Bayesian inference framework for latent Gaussian models. It  
175 was chosen over Markov Chain Monte Carlo (MCMC) due to its faster com-  
176 putation and ability to efficiently handle large datasets. This approach uses  
177 analytical approximations and numerical integration to estimate posterior  
178 distributions for model parameters. Model selection was based on the scores

179 of Deviance Information Criterion (DIC), Watanabe-Akaike Information Cri-  
180 terion (WAIC) and the effective number of parameters.

### 181 **3. Results**

#### 182 *3.1. Understanding case trends in the districts*

183 Nationwide and district-level trends for confirmed cases over the study  
184 period are depicted in Fig. 1C. Higher case counts were observed in major  
185 urban centres, including Blantyre, Lilongwe, Mzimba/Mzuzu, and Zomba,  
186 as well as in Neno and Mangochi. A sharp rise in cases occurred in Blantyre  
187 during the fourth wave, likely linked to the characteristics of the Omicron  
188 variant, which dominated this wave. Previous studies on the epidemiological  
189 and phylogenetic analyses of SARS-CoV-2 indicated that Omicron preva-  
190 lence was notably higher in southern Malawi, where Blantyre is located. For  
191 improved comparison across districts, the data were standardized, with the  
192 results presented in Fig. S2 of the Supplementary Material 3.2. Standardised  
193 case numbers were exceptionally high in Neno during the second wave and  
194 in Blantyre during the fourth wave. Additionally, Zomba, Lilongwe, Mzuzu,  
195 and Mangochi experienced elevated risks at various points compared to other  
196 districts not explicitly highlighted.

(A)

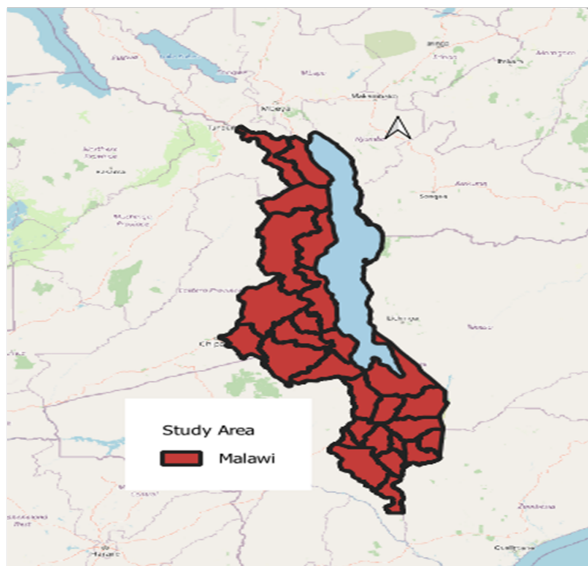

(B)

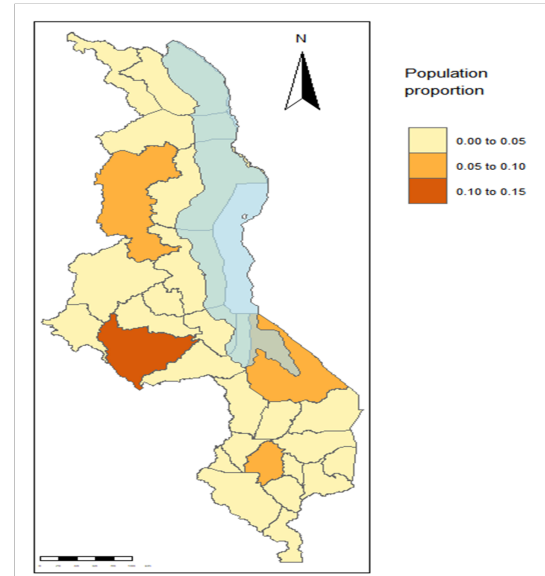

(C)

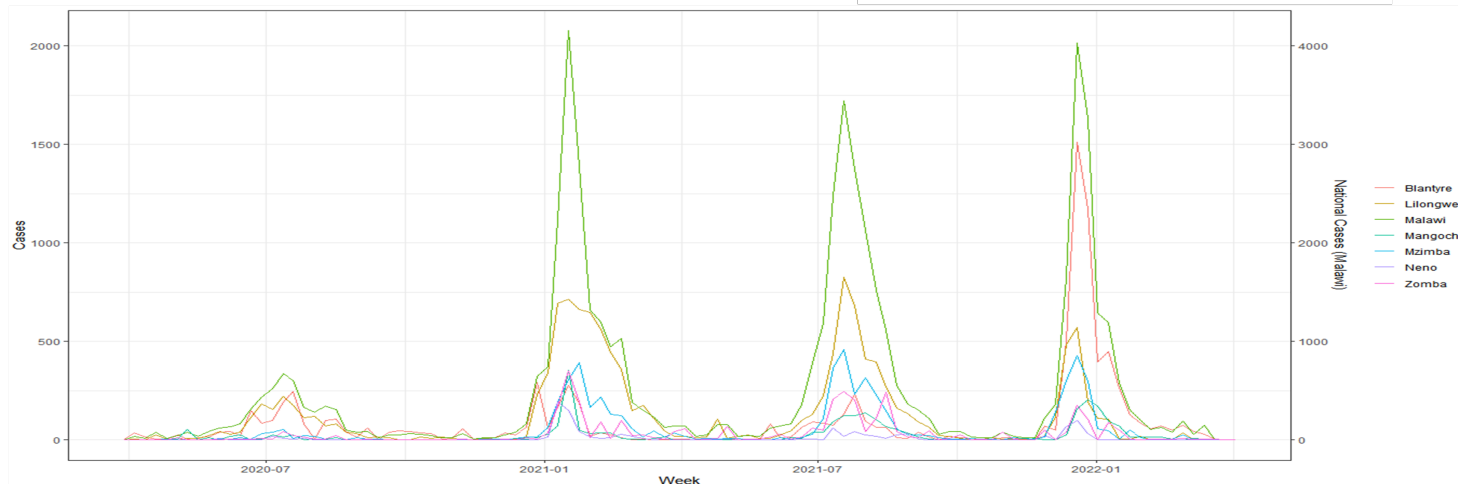

Figure 1: (A) The study area (Malawi). Map was created using QGIS version 3.40.0 – 1 available at <https://qgis.org/>. (B) Population proportion map. The blue-shaded area is Lake Malawi. The shapefiles for the districts were obtained from <https://gadm.org/data.html> while the Lake Malawi shapefile was obtained from the Natural Earth website, <https://www.naturalearthdata.com/>. (C) National and district curves for raw data.

197 *3.2. Model fitting*

198 Before fitting spatiotemporal models, a Poisson generalised linear model  
199 (GLM) with explanatory variables age, poverty, population density, pre-  
200 cipitation, humidity, and temperature, was fitted to the data. Interest-  
201 ingly, the summary for the GLM showed that risk was high in the age  
202 group 40-49, followed by the age group 50+. The minimal risk was ob-  
203 served in age group 0-19. Additionally, we found population density ( $\delta =$   
204 0.0019, 95% CRI (0.0018, 0.0019)) and poverty ( $\omega = 0.0325$ , 95% CRI (0.0209, 0.0440))  
205 to be significant. Furthermore, we found that out of the environmental vari-  
206 ables, precipitation was significant, therefore in subsequent models, we only  
207 use precipitation in our model.

208 Then we fitted models I to X as summarized in Table 2 and the model  
209 with the least DIC and WAIC scores as well as the moderate effective number  
210 of parameters was selected as the best fit (see Table 3).

Table 3: Table showing the result of the model selection criteria (DIC, WAIC and effective number of parameters for WAIC) for the ten models considered.

| Model | Description                                                                                                                     | DIC           | WAIC          | $P_{WAIC}$   |
|-------|---------------------------------------------------------------------------------------------------------------------------------|---------------|---------------|--------------|
| I     | Age, poverty, population density and precipitation                                                                              | 118,000       | 518,000       | 209,000      |
| II    | Age, poverty, population density, precipitation and convolution                                                                 | 138,000       | 798,000       | 338,000      |
| III   | Age, poverty, population density, precipitation, convolution and general time trend                                             | 136,000       | 699,000       | 289,000      |
| IV    | Age, poverty, population density, precipitation, convolution and rw1                                                            | 59,800        | 123,000       | 30,600       |
| V     | Age, poverty, population density, precipitation, convolution and rw2                                                            | 59,800        | 123,000       | 30,600       |
| VI    | Age, poverty, population density, precipitation, convolution, rw1 and space-time interaction type 1                             | 33,200        | 46,000        | 6,080        |
| VII   | Age, poverty, population density, precipitation, convolution, rw1 and space-time interaction type 2                             | 33,200        | 46,300        | 6,080        |
| VIII  | Age, poverty, population density, precipitation, convolution, rw1 and space-time interaction type 3                             | -15,600,000   | 1,090,000     | 529,000      |
| IX    | Age, poverty, population density, precipitation, convolution, rw1 and space-time interaction type 4                             | 33,300        | 46,100        | 5,900        |
| X     | Age, poverty, population density, precipitation, convolution, rw1, space-time interaction type 4 and space-time-age interaction | <b>32,500</b> | <b>36,200</b> | <b>5,730</b> |

211 Model VIII has an extremely large negative DIC and a high WAIC, in-  
 212 dicating poor data fit or excessive model complexity, which renders its esti-  
 213 mates unreliable. The analysis proceeded with the best-fitting model, Model  
 214 X, which includes age and precipitation as fixed effects, along with poverty  
 215 and population density as random effects. The model also incorporates spa-  
 216 tial, temporal, and spatiotemporal interaction of type 4, as well as an in-  
 217 dependent space-time-age interaction. As shown in Table 4, for the fixed  
 218 effects, individuals aged 40-49 are at the highest risk, followed by those in  
 219 the oldest age group (50+). The elevated risk in the 40-49 age group is likely  
 220 due to their status as the most productive and active working demographic.  
 221 A positive correlation is observed between COVID-19 risk and precipitation;  
 222 however, this relationship is not statistically significant as the confidence  
 223 interval includes zero. All random effects, including poverty, population den-  
 224 sity, spatial, temporal, and the interactions of space and time, as well as  
 225 space, time, and age, show significant effects on COVID-19 risk, as indicated  
 226 in Table 4.

Table 4: Summary of the parameter estimate (posterior mean) of the fixed and random effects for model X and their corresponding 95% credible interval (CRI)

| Parameters                               | Estimate | 95% CRI          |
|------------------------------------------|----------|------------------|
| <b>Fixed effects</b>                     |          |                  |
| Intercept                                | -9.06    | (-10.2, -8.79)   |
| Age group 20-29                          | 2.04     | (1.98, 2.12)     |
| Age group 30-39                          | 2.33     | (2.26, 2.40)     |
| Age group 40-49                          | 2.47     | (2.40, 2.54)     |
| Age group 50+                            | 2.43     | (2.37, 2.51)     |
| Precipitation                            | 0.60     | (-0.86, 2.07)    |
| <b>Random effects</b>                    |          |                  |
| Precision for Poverty                    | 27,900   | (2,070, 112,000) |
| Precision for Population density         | 24,000   | (2,910, 90,500)  |
| Precision for BYM2                       | 50.8     | (2.52, 262)      |
| Mixing for BYM2                          | 0.314    | (0.058, 0.716)   |
| Precision for corrected time             | 1.62     | (1.17, 2.16)     |
| Precision for independent time           | 22,800   | (4,840, 56,200)  |
| Precision for space-time interaction     | 0.032    | (0.028, 0.037)   |
| Precision for space-time-age interaction | 2.73     | (2.53, 2.95)     |

227 Further analysis of the coefficients (log risks) for the age groups, illus-

228 trated in the forest plot in the Supplementary Material, reveals that the risk  
229 in all age groups is lower than the baseline assumed by the model, typically 1.  
230 Additionally, the credible intervals for all groups are narrow and do not cross  
231 the zero line, indicating high confidence in the reduced risk. The coefficient  
232 for the 0-19 age group is the furthest to the left, suggesting a significantly  
233 lower risk compared to the other groups.

234 Population density and poverty were modelled as random effects. The  
235 results showed district-level variations in how population density influenced  
236 COVID-19 risk, attributed to unknown factors (see Fig. 2C). In the South-  
237 ern region, population density in Blantyre and the areas east of Blantyre  
238 excluding Thyolo and Zomba was found to contribute less to risk. Simi-  
239 larly, the high population density in Lilongwe city (central region) also had  
240 a minimal contribution to COVID-19 risk. These findings imply that other  
241 unmeasured factors may be driving risk patterns in these urban centers. No-  
242 tably, districts such as Zomba city and Thyolo (South), Salima and Ntchisi  
243 (Central), and Rumphi (North) displayed higher-than-expected COVID-19  
244 risk. This suggests that unknown factors associated with population density,  
245 such as mobility patterns, densely populated living spaces or compliance with  
246 risk prevention measures, could be influencing these variations. The analysis  
247 also revealed that poverty was less strongly associated with COVID-19 risk  
248 in certain districts of southern Malawi, as illustrated in Fig. 2D. Conversely,  
249 many central and northern districts exhibited higher COVID-19 risk than ex-  
250 pected, based solely on poverty, population density, age, and precipitation.  
251 Interestingly, high poverty levels were also observed in districts along Lake  
252 Malawi, suggesting that unmeasured factors such as inadequate sanitation  
253 or mobility patterns might be significant contributors to the elevated risk.



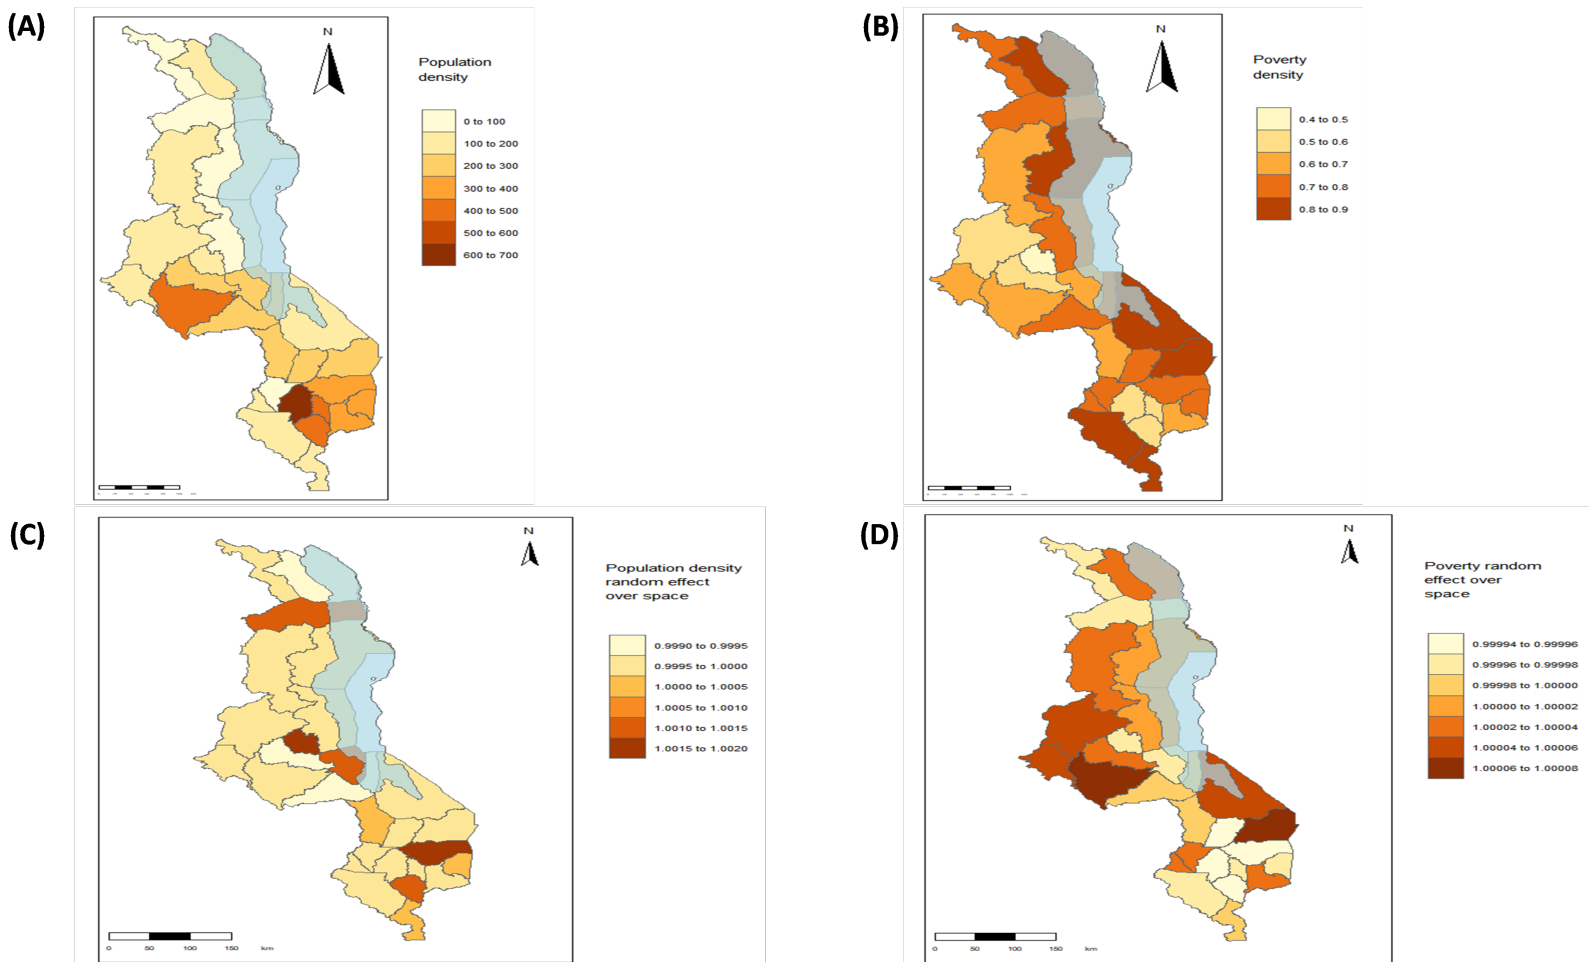

Figure 2: (A) Population density. (B) Poverty density. (C) Effect of population density over space. (D) Effect of poverty over space. The blue-shaded area in the maps is Lake Malawi. The shapefiles for the districts were obtained from <https://gadm.org/data.html> while the Lake Malawi shapefile was obtained from the Natural Earth website, <https://www.naturalearthdata.com/>

254 Wave one spanned from April to September 2020, wave two from Novem-  
255 ber 2020 to February 2021, wave three from May to September 2021, and the  
256 fourth wave from November 2021 to February 2022. Relative risks ranged  
257 between  $8.8 \times 10^{-8}$  and 1.0, with an overall mean of 0.015, with this huge  
258 variability reflecting the large differences in prevalence and incidence typical  
259 of waves of an infectious disease.

260 For the 0-19 age group, the relative risk remained consistently low and  
261 nearly constant over time, except for an increase in Neno (southern region)  
262 between November 2020 and February 2021 (see Fig. S4 in the Supplementary  
263 Material). In contrast, other age groups showed significant variations in risk  
264 across districts and time periods.

265 In the age group 20-29, elevated risk was noted in Salima during the  
266 second wave as shown in Fig. S5 in the Supplementary Material. Between  
267 November 2021 and February 2022 (fourth wave), individuals in this age  
268 group experienced heightened risk in Rumphu, Mzimba, Nkhatakota, Blan-  
269 tyre, and Zomba. Similarly, the 30-39 age group had an increased risk in  
270 Blantyre during this period, with additional clusters identified in northern  
271 Malawi (see Fig. S6 in the Supplementary Material).

272 For those aged 40 and above, the highest risk occurred in Blantyre around  
273 December 2021, as illustrated in Fig. 3 and Fig. S7 in the Supplementary  
274 Material. Overall, elevated risks were most pronounced during the fourth  
275 peak (19-25 December, 2021) and, to a lesser extent, during the third peak  
276 (18-24 July, 2021). Districts with notable risks included Rumphu, Mzimba,  
277 and Nkhatakota Bay in the north; Nkhatakota, Lilongwe, and Salima in the  
278 central region; and Blantyre and Zomba in the south.

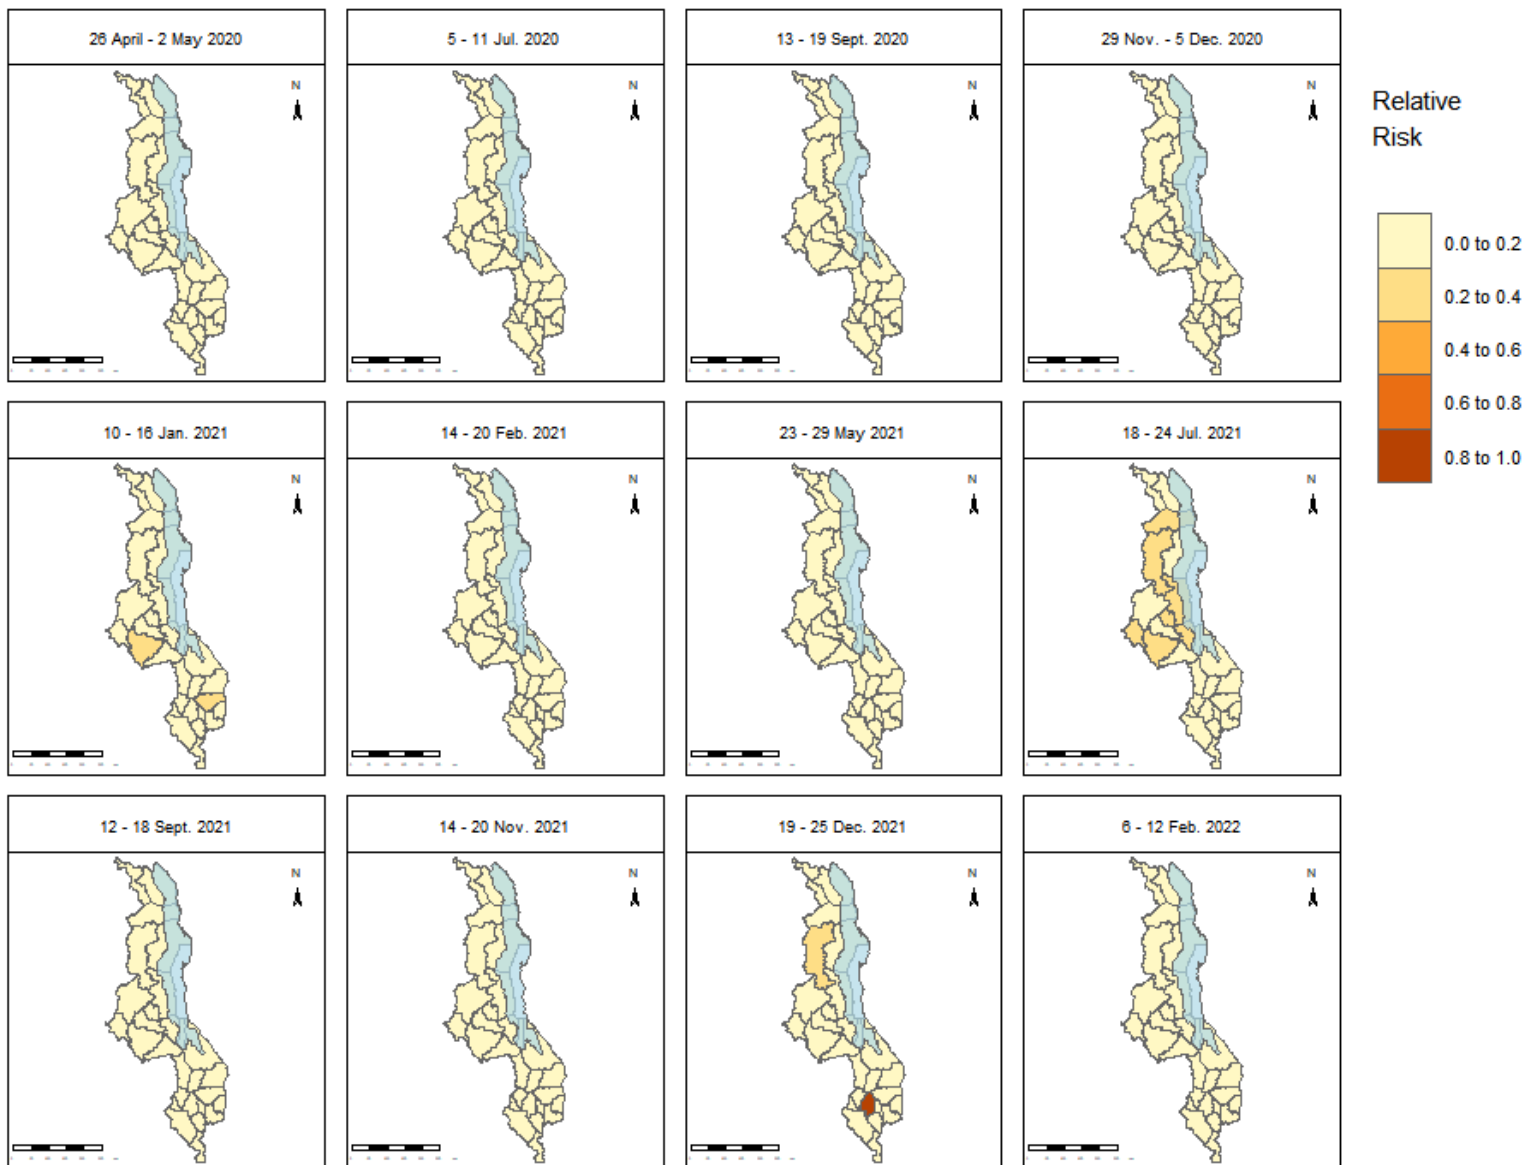

Figure 3: **Overall relative risk maps for age group 40 – 49 in selected weeks.** Highest risk was observed in Blantyre in 2021 when approaching the festive season of Christmas. The blue-shaded area in the maps is Lake Malawi. The shapefiles used to create the maps are openly available at <https://data.humdata.org/dataset/cod-ab-mwi?> and the link to the data licence is <https://data.humdata.org/faqs/licenses>.

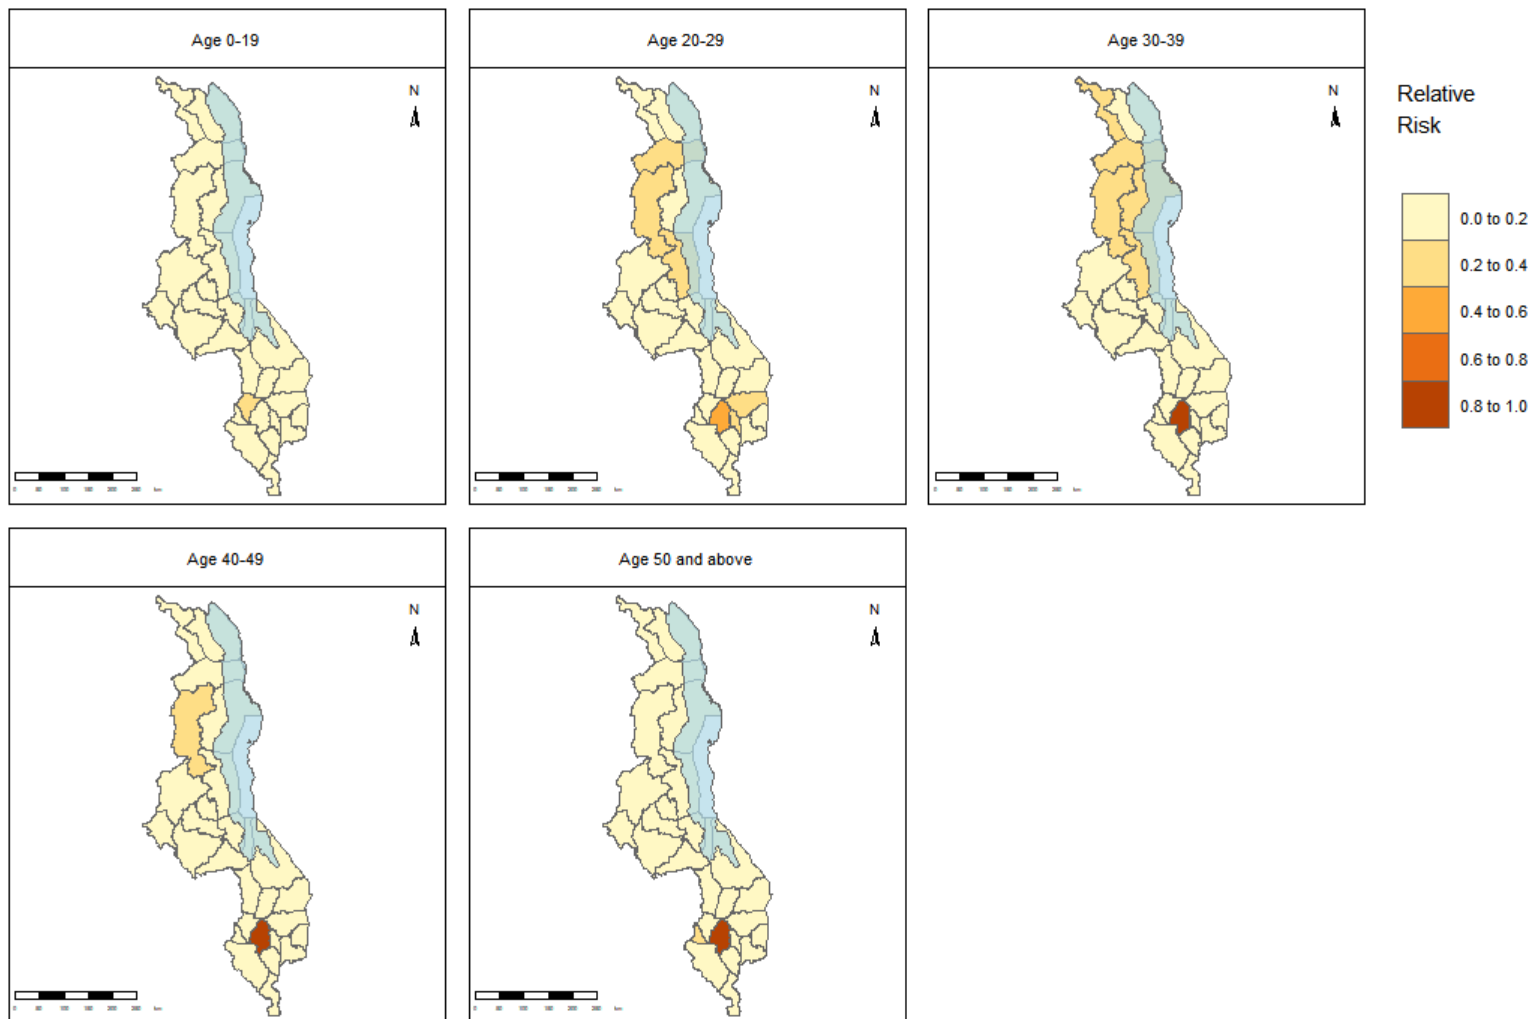

Figure 4: **Overall relative risk maps for all age groups between 19 and 25 December 2021.** Maps for all age groups during this period show an increased risk in the south, particularly in Blantyre city. The blue-shaded area in the maps is Lake Malawi. The shapefiles used to create the maps are openly available at <https://data.humdata.org/dataset/cod-ab-mwi?> and the link to the data licence is <https://data.humdata.org/faqs/licenses>.

279 Fig. S8 in the Supplementary Material illustrates the covariate-adjusted  
280 relative risk and the posterior spatial random effects across districts. The  
281 map emphasises significant unexplained effects, especially in southern dis-  
282 tricts such as Neno, Mwanza, Chikwawa, Nsanje, Blantyre, Thyolo, Chi-  
283 radzulu, Mulanje, and Zomba, in contrast to the central and northern re-  
284 gions. This indicates the presence of additional unidentified factors con-  
285 tributing to the disease risk in these areas. Cross-border interactions with  
286 Mozambique, particularly through the port city of Beira, could contribute to  
287 disease spillover. Additionally, localized outbreaks in trade hubs like Blan-  
288 tyre, which has high interaction levels, might be driven by superspreading  
289 events. The presence of the highly transmissible Omicron variant, which  
290 impacted the southern region severely, could further complicate the situa-  
291 tion. Omicron was first identified in South Africa, and the high cross-border  
292 mobility between Malawi and South Africa likely facilitated its spread into  
293 southern Malawi, where border post is located.

294 Temporal effects (modelled using a random walk of order 1) with 95%  
295 intervals for the 40-49 age group were further examined. The results revealed  
296 the presence of unmeasured temporal influences in the data that could not  
297 be explained by known demographic or environmental factors, such as age  
298 or precipitation. A pattern of heightened risk was observed at the end and  
299 beginning of the year, as well as mid-year. These findings suggest underlying  
300 temporal dynamics that warrant further exploration. An illustration of these  
301 results is provided in Fig. S9 in the Supplementary Material.

302 The variation in COVID-19 risk over time across districts for the 40-49  
303 age group was analysed and the results delineate the four distinct waves of  
304 infection, across nearly all districts. The relative risk remained below 1 in all  
305 districts throughout the study period, except for Blantyre, indicating that  
306 the observed infection rates were lower than the baseline expectation. This  
307 consistent pattern highlights spatial and temporal similarities in how the  
308 pandemic unfolded across the districts. For a visualisation of these results,  
309 refer to Fig. S10 and Fig. S11 in the Supplementary Material.

310 Risk variation over time across all age groups was monitored in a few  
311 selected districts where risk was high, including the two cities, Blantyre and  
312 Lilongwe, as well as Neno. Results indicated that the 40-49 age group ex-  
313 perience elevated risk in Blantyre between November 2021 and February  
314 2022. In Neno, the youngest age group was at higher risk from November  
315 2020 to February 2021, while the oldest age group was most affected be-  
316 tween May 2021 and February 2022. From November 2020 to February 2021

317 in Lilongwe, the age group 40-49 experienced the highest COVID-19 risk  
318 compared to other age groups. In contrast, from May to September 2021,  
319 the highest risk shifted to the oldest age group, 50 and above. These findings  
320 are visualised in Fig. S12 in the Supplementary Material.

321 Exceedance probability was used to assess how frequently the estimated  
322 risk in districts surpassed a defined threshold, enabling the identification  
323 of disease clusters and hotspots. Weekly average risk values served as the  
324 thresholds. Results for selected weeks are presented in Fig. 5. The findings  
325 revealed that risk was consistently high in the cities of Blantyre and Lilongwe.  
326 Occasionally, elevated risk was observed in Mzuzu/Mzimba and Zomba, as  
327 well as in several lakeshore districts and other areas, including Dowa, Mchinji,  
and Ntcheu in the central region, and Phalombe in the southern region.

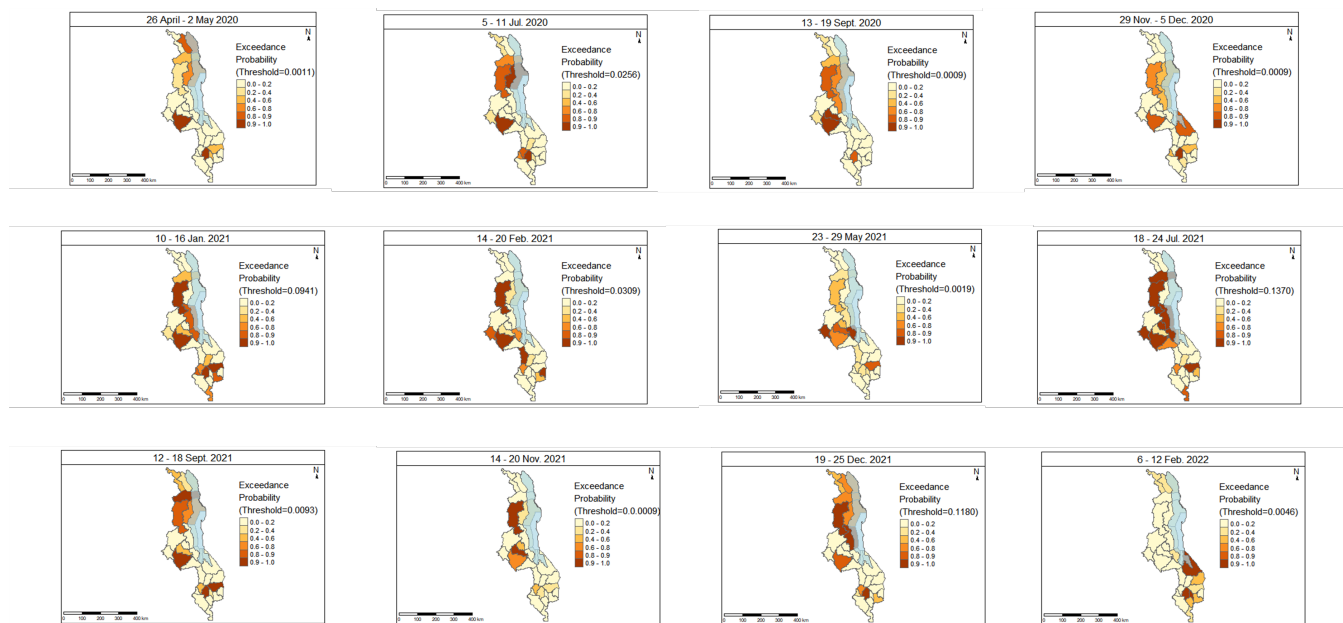

Figure 5: **Exceedance probability for the age group 40 – 49 in selected weeks.** The blue-shaded area in the maps is Lake Malawi. The shapefiles used to create the maps are openly available at <https://data.humdata.org/dataset/cod-ab-mwi?> and the link to the data licence is <https://data.humdata.org/faqs/licenses>.

328

## 329 Discussion

330 Here we have presented a spatiotemporal model of Malawi to explore the  
331 association between age groups, poverty, population density, precipitation,

332 and COVID-19 risk, and to identify hotspot areas. The analysis utilized  
333 data collected from 22 April 2020 to 27 March 2022. Spatiotemporal models  
334 incorporating fixed effects, spatial and temporal random effects, and interac-  
335 tion terms (space-time and space-time-age) were applied. Among the various  
336 models tested, the model that demonstrated superior performance, with the  
337 lowest Deviance Information Criterion (DIC) and Watanabe-Akaike Infor-  
338 mation Criterion (WAIC) scores, included covariates such as age, poverty  
339 proportion, population density, and precipitation, along with spatial effects,  
340 temporal effects, a Type 4 spatiotemporal interaction, and an independent  
341 interaction term for space, time, and age.

342 This study identifies significant effects of age on COVID-19 incidence,  
343 consistent with findings by Ngwira *et al.* (2021) [16] and Chinkaka *et al.*  
344 (2023) [15], although Chinkaka *et al.* (2023) [15] reported these effects as  
345 not statistically significant ( $p = 0.176$ ). The inclusion of multiple age groups  
346 in this study reveals an interesting result: the risk is higher in the 40–49  
347 age group than in the 50+ age group. This finding contrasts with much of  
348 the literature, where COVID-19 risk is generally associated with the oldest  
349 age groups. The elevated risk observed in the 40–49 age group may be at-  
350 tributed, but not limited, to several factors. Individuals in this age group  
351 may have weaker immune systems compared to younger populations (un-  
352 der 30), increasing their susceptibility to infection. Additionally, the 40–49  
353 age group is often more active in the workforce, engaging in activities that  
354 may expose them to higher contact rates and transmission risks. By contrast,  
355 many individuals over 50 years may be retired and spend more time at home,  
356 potentially reducing their exposure to the virus.

357 This study finds a positive correlation between population density and  
358 COVID-19 risk, consistent with findings by Chinkaka *et al.* (2023) [15] and  
359 other studies conducted in Africa and abroad, including Md Iderus *et al.*  
360 (2022) [42], Nguimkeu and Tadadjeu (2021) [43], and Wong and Li (2020)  
361 [44]. However, further analysis suggests that the impact is not solely at-  
362 tributable to population density, age, poverty, or precipitation. Unmeasured  
363 factors, such as mobility patterns and compliance with public health mea-  
364 sures, likely play a significant role. In contrast to Ngwira *et al.* (2021) [16],  
365 this study reveals a positive association between poverty and SARS-CoV-2  
366 risk. This association is likely influenced by overcrowded living conditions,  
367 limited access to healthcare, and poor hygiene. Additionally, high mobility  
368 and reliance on informal work may exacerbate risk. Many individuals liv-  
369 ing in poverty depend on daily wages or informal employment, which often



370 requires frequent travel and interactions in crowded markets or workplaces.  
371 Furthermore, poverty can limit adherence to stay-at-home orders or lockdown  
372 measures, as daily income is essential for survival. These findings highlight  
373 the multifaceted relationship between socioeconomic factors and COVID-19  
374 risk, emphasising the need to address structural inequities and support vul-  
375 nerable populations to reduce transmission

376 Infection rates peaked during the colder months and festive seasons.  
377 COVID-19 impacted different districts at varying times, with higher risks ob-  
378 served in cities and lake-shore districts. Blantyre city was the most affected.  
379 The elevated risk in cities may be attributed to the influx of tourists, as in-  
380 ternational airports are located in urban centers, facilitating the importation  
381 of cases. Similarly, the heightened risk in lake-shore areas such as Rumphu,  
382 Nkhata Bay, Nkhotakota, Salima, and Mangochi can also be explained by  
383 the presence of tourists, contributing to both imported and locally transmit-  
384 ted cases. The analysis of random effects further suggests that increased risk  
385 in lake-shore areas may stem from inadequate hygiene practices and limited  
386 compliance with public health interventions. In Blantyre city, the higher risk  
387 could be linked to its status as Malawi's leading trade center, attracting large  
388 numbers of people seeking economic opportunities. This population influx  
389 likely increases crowding and mobility, amplifying transmission risks [45].

390 We have identified three significant limitations of this study. The first of  
391 these is that we do not have access to underlying estimates of infection preva-  
392 lence and incidence independently of case finding, and hence there may be  
393 confounding with test-seeking behaviour; however, this is common to the ma-  
394 jority of studies of infectious disease, and when studies of infection are carried  
395 out in European countries, biases due to testing were not typically large [46].  
396 The second limitation is the absence of COVID-19 vaccination data in the  
397 model. Vaccination significantly impacts transmission and severity. With-  
398 out accounting for vaccination data, the model may overestimate the risk  
399 in areas with high vaccination rates or underestimate the risk in districts  
400 with low vaccination uptake. Furthermore, the spatial and temporal vari-  
401 ability of vaccine rollouts, influenced by socio-economic and political factors,  
402 adds complexity that the model does not account for. Including vaccination  
403 data in future models would provide a more accurate and comprehensive  
404 understanding of COVID-19 dynamics. The third notable limitation of this  
405 study is the use of the average relative risk for the given week as the thresh-  
406 old for calculating exceedance probability. This approach is suboptimal, as  
407 the threshold should ideally be derived from expert judgment or established



408 standards to ensure greater accuracy and relevance.

409 This work opens several avenues for future exploration and enhancement.  
410 The current analysis employs a Conditional Autoregressive (CAR) structure,  
411 which is based on the contiguity of districts. While effective, it may be ben-  
412 efiticial to explore alternative spatial structures, such as Gaussian Random  
413 Fields (GRFs), which are more flexible and allow for smoother modelling of  
414 spatial relationships based on distance rather than strict adjacency [47, 48].  
415 GRFs can better capture subtle spatial dependencies and provide a richer  
416 representation of spatial variation. Furthermore, we can also incorporate a  
417 more advanced mathematical modelling approach that integrates both de-  
418 terministic and stochastic elements, providing a comprehensive framework  
419 to better capture the complex dynamics of COVID-19 transmission. This  
420 approach will enhance our understanding of how different factors influence  
421 the spread of COVID-19 over time and across different regions [49].

## 422 **Conclusion**

423 This study identifies significant effects of space, time, age, population  
424 density, and poverty on COVID-19 transmission in Malawi, while the effect  
425 of precipitation was not significant. Notably, the risk was highest during  
426 the colder months (June and July), the festive season (December), and Jan-  
427 uary. Urban areas and districts along Lake Malawi were more affected than  
428 other areas, with the 40–49 age group being at particularly high risk. Given  
429 these findings, if COVID-19 resurges or if similar infectious diseases with  
430 comparable characteristics emerge in the future, priority should be given to  
431 vaccinating the working population in urban areas and tourist centres during  
432 cold months and festive seasons. Additionally, the government must ensure  
433 that individuals in these high-risk areas comply with public health interven-  
434 tions and have access to adequate healthcare services.

## 435 **Supporting information**

### 436 *S1. Supplementary Material*

#### 437 **Use of AI for Language Enhancement**

438 Artificial intelligence (AI)-assisted tools were used to enhance the read-  
439 ability and grammatical accuracy of this manuscript. However, all intellec-

440 tual content, interpretations, and conclusions remain the responsibility of the  
441 authors.

#### 442 **Declaration of Competing Interest**

443 None

#### 444 **4. Ethics approval**

445 This study was approved by the National Commission for Science and  
446 Technology, Malawi (Approval No: P.02/23/733).

#### 447 **Funding**

448 MKA was supported by the Schlumberger Foundation–Faculty for the  
449 Future. OJ was supported by the Wellcome Trust (228264/Z/23/Z). IH and  
450 TH were supported by the Wellcome Trust (227438/Z/23/Z) and the UKRI  
451 Impact Acceleration Account (IAA 386).

#### **References**

1. Anyangwe SC and Mtonga C. Inequities in the global health workforce: the greatest impediment to health in sub-Saharan Africa. *International journal of environmental research and public health* 2007; 4:93–100
2. Park SE. Epidemiology, virology, and clinical features of severe acute respiratory syndrome coronavirus 2 (SARS-CoV-2; coronavirus disease-19). *Pediatric Infection and Vaccine* 2020; 27:1–10
3. Zhu N, Zhang D, Wang W, Li X, Yang B, Song J, Zhao X, Huang B, Shi W, Lu R, et al. A novel coronavirus from patients with pneumonia in China, 2019. *New England journal of medicine* 2020
4. Wang C, Wang Z, Wang G, Lau JYN, Zhang K, and Li W. COVID-19 in early 2021: current status and looking forward. *Signal Transduction and Targeted Therapy* 2021; 6:1–14
5. Lone SA and Ahmad A. COVID-19 pandemic—an African perspective. *Emerging microbes & infections* 2020; 9:1300–8

6. World Health Organisation (WHO). Statement on the second meeting of the International Health Regulations (2005) Emergency Committee regarding the outbreak of novel coronavirus (2019-nCoV). [https://www.who.int/news/item/30-01-2020-statement-on-the-second-meeting-of-the-international-health-regulations-\(2005\)-emergency-committee-regarding-the-outbreak-of-novel-coronavirus-\(2019-ncov\)](https://www.who.int/news/item/30-01-2020-statement-on-the-second-meeting-of-the-international-health-regulations-(2005)-emergency-committee-regarding-the-outbreak-of-novel-coronavirus-(2019-ncov)). 2020
7. Pak A, Adegboye OA, Adekunle AI, Rahman KM, McBryde ES, and Eisen DP. Economic consequences of the COVID-19 outbreak: the need for epidemic preparedness. *Frontiers in public health* 2020; 8:241
8. Green D, Moszczynski M, Asbah S, Morgan C, Klyn B, Foutry G, Ndira S, Selman N, Monawe M, Likaka A, et al. Using mobile phone data for epidemic response in low resource settings—A case study of COVID-19 in Malawi. *Data & Policy* 2021; 3
9. Malawi UN. Declaration of State of Disaster by Malawi President Peter Mutharika. <https://malawi.un.org/en/46778-declaration-state-disaster-malawi-president-peter-mutharika>. Accessed: 2024-01-18. 2020
10. United Nations Malawi. Speech by Minister of Health's on additional measures on COVID-19. <https://malawi.un.org/en/46796-speech-minister-healths-additional-measures-covid-19>. Accessed: 2024-01-18. 2020
11. Eslami H and Jalili M. The role of environmental factors to transmission of SARS-CoV-2 (COVID-19). *Amb Express* 2020; 10:92
12. Zhu Y, Xie J, Huang F, and Cao L. Association between short-term exposure to air pollution and COVID-19 infection: Evidence from China. *Science of the total environment* 2020; 727:138704
13. Tantrakarnapa K, Bhopdhornangkul B, and Nakhaapakorn K. Influencing factors of COVID-19 spreading: a case study of Thailand. *Journal of Public Health* 2020 :1–7
14. Theodore DA, Branche AR, Zhang L, Graciaa DS, Choudhary M, Hatlen TJ, Osman R, Babu TM, Robinson ST, Gilbert PB, et al. Clinical and demographic factors associated with COVID-19, severe COVID-19, and SARS-CoV-2 infection in adults: a secondary cross-protocol analysis of 4 randomized clinical trials. *JAMA network open* 2023; 6:e2323349–e2323349

15. Chinkaka E, Davis KF, Chiwanda D, Kachingwe B, Gusala S, Mvula R, Chauluka F, and Klinger JM. Geospatial Coronavirus Vulnerability Regression Modelling for Malawi Based on Cumulative Spatial Data from April 2020 to May 2021. *Journal of Geographic Information System* 2023; 15:110–21
16. Ngwira A, Kumwenda F, Munthali EC, and Nkolokosa D. Spatial temporal distribution of COVID-19 risk during the early phase of the pandemic in Malawi. *PeerJ* 2021; 9:e11003
17. Yechezkel M, Weiss A, Rejwan I, Shahmoon E, Ben-Gal S, and Yamin D. Human mobility and poverty as key drivers of COVID-19 transmission and control. *BMC public health* 2021; 21:1–13
18. Finch WH and Hernández Finch ME. Poverty and Covid-19: rates of incidence and deaths in the United States during the first 10 weeks of the pandemic. *Frontiers in Sociology* 2020; 5:47
19. Hamidi S, Sabouri S, and Ewing R. Does density aggravate the COVID-19 pandemic? Early findings and lessons for planners. *Journal of the American Planning Association* 2020; 86:495–509
20. Morawska L, Tang JW, Bahnfleth W, Bluysen PM, Boerstra A, Buonanno G, Cao J, Dancer S, Floto A, Franchimon F, et al. How can airborne transmission of COVID-19 indoors be minimised? *Environment international* 2020; 142:105832
21. Mwiinde AM, Siankwilimba E, Sakala M, Banda F, and Michelo C. Climatic and environmental factors influencing COVID-19 transmission—an African perspective. *Tropical Medicine and Infectious Disease* 2022; 7:433
22. Mecenas P, Bastos RTdRM, Vallinoto ACR, and Normando D. Effects of temperature and humidity on the spread of COVID-19: A systematic review. *PLoS one* 2020; 15:e0238339
23. Bherwani H, Gupta A, Anjum S, Anshul A, and Kumar R. Exploring dependence of COVID-19 on environmental factors and spread prediction in India. *npj Climate and Atmospheric Science* 2020; 3:38
24. Blangiardo M and Cameletti M. Spatial and spatio-temporal Bayesian models with R-INLA. John Wiley & Sons, 2015

25. Gayawan E, Awe OO, Oseni BM, Uzochukwu IC, Adekunle A, Samuel G, Eisen DP, and Adegboye OA. The spatio-temporal epidemic dynamics of COVID-19 outbreak in Africa. *Epidemiology & Infection* 2020; 148:e212
26. Tong C, Shi W, Zhang A, and Shi Z. Tracking and controlling the spatiotemporal spread of SARS-CoV-2 Omicron variant in South Africa. *Travel medicine and infectious disease* 2022; 46:102252
27. Adekunle IA, Tella SA, Oyesiku KO, and Oseni IO. Spatio-temporal analysis of meteorological factors in abating the spread of COVID-19 in Africa. *Heliyon* 2020; 6
28. Abdul IW. Spatio-Temporal Modelling of COVID-19 Dynamics in Africa. *European Journal of Scientific Research* 2020
29. Pavelic P, Giordano M, Keraita BN, Ramesh V, and Rao T. Groundwater availability and use in Sub-Saharan Africa: a review of 15 countries. International Water Management Institute, 2012
30. NSO MNSO. 2018 Malawi population and housing census. Lilongwe. 2019
31. PHIM. Public Health Institute of Malawi. <https://covid19.health.gov.mw/>. Accessed: 18-05-2023. 2023
32. Tatem AJ, Gething PW, Bhatt S, Weiss D, and Pezzulo C. Pilot high resolution poverty maps. University of Southampton/Oxford. DOI: 10.5258/SO-TON/WP00157. 2013
33. NASA POWER Project Team. NASA Prediction of Worldwide Energy Resources (POWER). Accessed: 2024-12-06. 2024. Available from: <https://power.larc.nasa.gov/>
34. WorldClim Team. WorldClim: Global Climate Data. Accessed: 2024-12-06. 2024. Available from: <https://worldclim.org/data/index.html>
35. Garland P, Babbitt D, Bondarenko M, Sorichetta A, Tatem AJ, and Johnson O. The COVID-19 pandemic as experienced by the individual. [arXiv:2005.01167]. 2020
36. Knorr-Held L. Bayesian modelling of inseparable space-time variation in disease risk. *Statistics in medicine* 2000; 19:2555–67

37. Simpson D, Rue H, Riebler A, Martins TG, and Sørbye SH. Penalising model component complexity: A principled, practical approach to constructing priors. *Statistical Science* 2017; 32
38. Besag J, York J, and Mollié A. Bayesian image restoration, with two applications in spatial statistics. *Annals of the institute of statistical mathematics* 1991; 43:1–20
39. Schmidt AM and Nobre WS. Conditional autoregressive (CAR) model. *Wiley StatsRef: Statistics Reference Online* 2014 :1–11
40. Fattah EA and Rue H. Approximate bayesian inference for the interaction types 1, 2, 3 and 4 with application in disease mapping. *arXiv preprint arXiv:2206.09287* 2022
41. Rue H, Martino S, and Chopin N. Approximate Bayesian inference for latent Gaussian models by using integrated nested Laplace approximations. *Journal of the Royal Statistical Society Series B: Statistical Methodology* 2009; 71:319–92
42. Md Iderus NH, Lakha Singh SS, Mohd Ghazali S, Yoon Ling C, Cia Vei T, Md Zamri ASS, Ahmad Jaafar N, Ruslan Q, Ahmad Jaghfir NH, and Gill BS. Correlation between population density and COVID-19 cases during the third wave in malaysia: effect of the delta variant. *International Journal of Environmental Research and Public Health* 2022; 19:7439
43. Nguimkeu P and Tadadjeu S. Why is the number of COVID-19 cases lower than expected in Sub-Saharan Africa? A cross-sectional analysis of the role of demographic and geographic factors. *World Development* 2021; 138:105251
44. Wong DW and Li Y. Spreading of COVID-19: Density matters. *Plos one* 2020; 15:e0242398
45. International Trade Administration. Distribution and Sales Channels. <https://trade.gov/country-commercial-guides/malawi-distribution-and-sales-channels>. Accessed: 08-05-2024. 2024
46. Pouwels KB, House T, Pritchard E, Robotham JV, Birrell PJ, Gelman A, Vihta KD, Bowers N, Boreham I, Thomas H, Lewis J, Bell I, Bell JI, Newton JN, Farrar J, Diamond I, Benton P, Walker AS, and COVID-19 Infection Survey Team. Community prevalence of SARS-CoV-2 in Eng-

- land from April to November, 2020: results from the ONS Coronavirus Infection Survey. *The Lancet Public Health* 2021; 6:e30–e38
47. Lindgren F, Rue H, and Lindström J. An explicit link between Gaussian fields and Gaussian Markov random fields: the stochastic partial differential equation approach. *Journal of the Royal Statistical Society Series B: Statistical Methodology* 2011; 73:423–98
  48. Johnson O, Diggle P, and Giorgi E. A spatially discrete approximation to log-Gaussian Cox processes for modelling aggregated disease count data. *Statistics in medicine* 2019; 38:4871–87
  49. Bjørnstad ON, Shea K, Krzywinski M, and Altman N. The SEIRS model for infectious disease dynamics. *Nature methods* 2020; 17:557–9
